# Supplementary material
Source: PubMed Central journal article supplement (PMC1618089)
Supplement: 7601367s1.pdf [file 7601367s1.pdf]

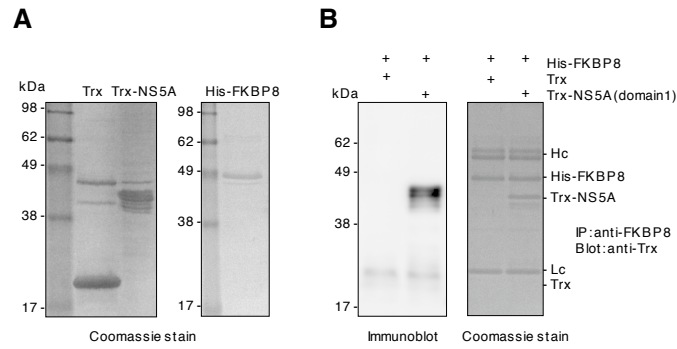

**Supplementary Figure 1. NS5A directly binds to FKBP8**

Purified thioredoxin, Trx-NS5A (A) and His-FKBP8 (B) in gel were stained with Coomassie brilliant blue G-250. These proteins were mixed and subjected to immunoprecipitation with anti-FKBP8 antibody. Precipitates were immunoblotted with anti-thioredoxin antibody (C) and stained with Coomassie brilliant blue G-250 (D).
