# Supplementary material
Source: PubMed Central journal article supplement (PMC1618089)
Supplement: 7601367s2.pdf [file 7601367s2.pdf]

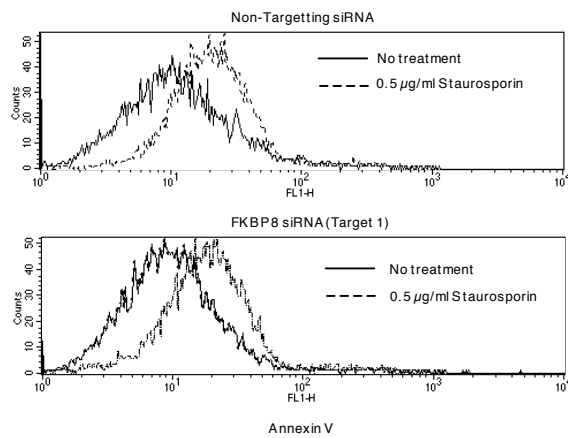

**Supplementary Figure 2. Lack of apoptosis in FKBP8-knockdown cells**

Huh7 9-13 cells were transfected with siRNA for the non-target control or FKBP8-Target 1 at a concentration of 80 nM, which was able to suppress the expression of FKBP8 (Fig. 5). Some cells were treated with 0.5 μg/ml staurosporin as a control for apoptosis. The cells were stained using the Vybrant apoptosis assay kit 1 (Molecular Probes, Eugene, OR).
