# Supplementary material
Source: PubMed Central journal article supplement (PMC1618089)
Supplement: 7601367s4.pdf [file 7601367s4.pdf]

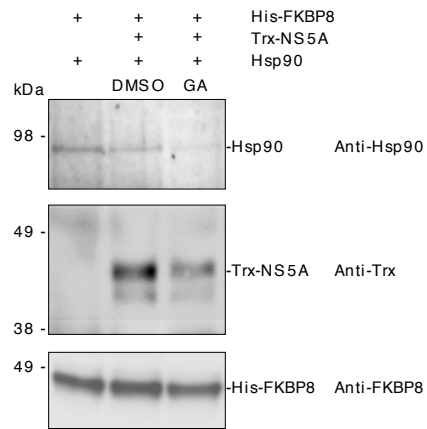

**Supplementary Figure 4. Disruption of NS5A/FKBP8/Hsp90 complexes by geldanamycin**

Purified His-FKBP8, Hsp90 and/or Trx-NS5A were mixed with DMSO or geldanamycin (GA) (100 nM) and subjected to immunoprecipitation with anti-FKBP8 antibody. Precipitates were immunoblotted with antibody to Hsp90, thioredoxin, or FKBP8.
